# Supplementary material for: A novel self-assembled-derived 1D MnO2@Co3O4 composite as a high-performance Li-ion storage anode material
Source: Royal Society of Chemistry journal article supplement (doi:10.1039/d0dt00980f), 2020-01-01
Supplement: d0dt00980f1.pdf [file d0dt00980f1.pdf]

# Supplementary Information for

## A novel self-assembled derived 1D $\text{MnO}_2@\text{Co}_3\text{O}_4$ composite as high-performance Li-ion storage anode materials

ZongtangLi<sup>1</sup>, XiaoLian\*<sup>1</sup>, Mingzai Wu<sup>2</sup>, FangcaiZheng<sup>3</sup>, YuanhaoGao<sup>4</sup> and HelinNiu\*<sup>1</sup>

---

<sup>1</sup>Anhui Province Key Laboratory of Chemistry for Inorganic/Organic Hybrid Functionalized Materials, Energy materials and devices key lab of Anhui Province for photoelectric conversion, College of Chemistry and Chemical Engineering, Anhui University, Hefei 230039, China

<sup>2</sup>School of Physics and Materials Science, Anhui University, Hefei 230039, China

<sup>3</sup>Institutes of Physical Science and information Technology, Anhui University, Hefei 230039, China

<sup>4</sup>Key Lab Micronano Mat Energy Storage, Xuchang University, Xuchang 461000, China

### CONTENTS

**Fig. S1.** TGA curves of (a) MnOOH, (b) ZIF-67.

**Fig. S2.** XRD patterns of ZIF-67, MnOOH and MnOOH@ZIF-67

**Fig. S3.** FT-IR spectrum of MnOOH@ZIF-67 and ZIF-67.

**Fig. S4.** XPS spectrum of MnOOH@ZIF-67. (a) survey spectrum of MnOOH@ZIF-67, (b) Mn 2p, (c) Co2p.

**Fig. S5.** H<sub>2</sub>-TPR profiles of MnO<sub>2</sub>@Co<sub>3</sub>O<sub>4</sub>.

**Fig. S6.** Raman spectrum of MnO<sub>2</sub>@Co<sub>3</sub>O<sub>4</sub>, MnO<sub>2</sub> and Co<sub>3</sub>O<sub>4</sub>.

**Table S1.** Electrochemical impedance parameters of the MnO<sub>2</sub>@Co<sub>3</sub>O<sub>4</sub>.

**Table S2.** Comparison of electrochemical properties of various cobalt-manganese oxides.

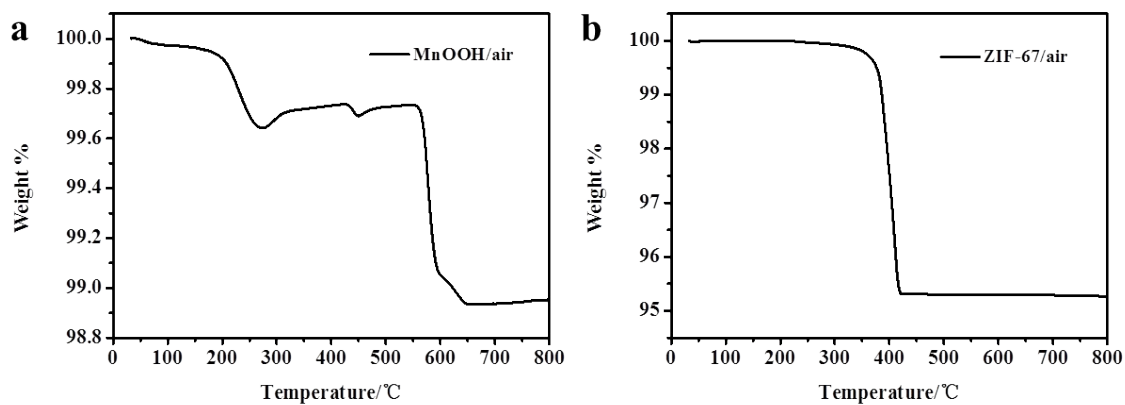

Fig. S1. TGA curves of (a) MnOOH, (b) ZIF-67.

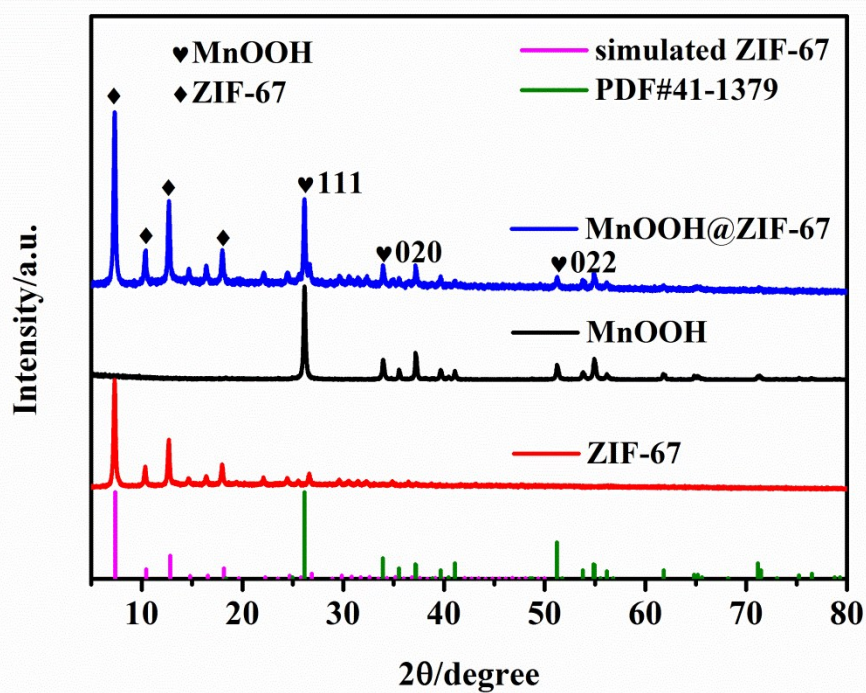

Fig. S2. XRD patterns of ZIF-67, MnOOH and MnOOH@ZIF-67.

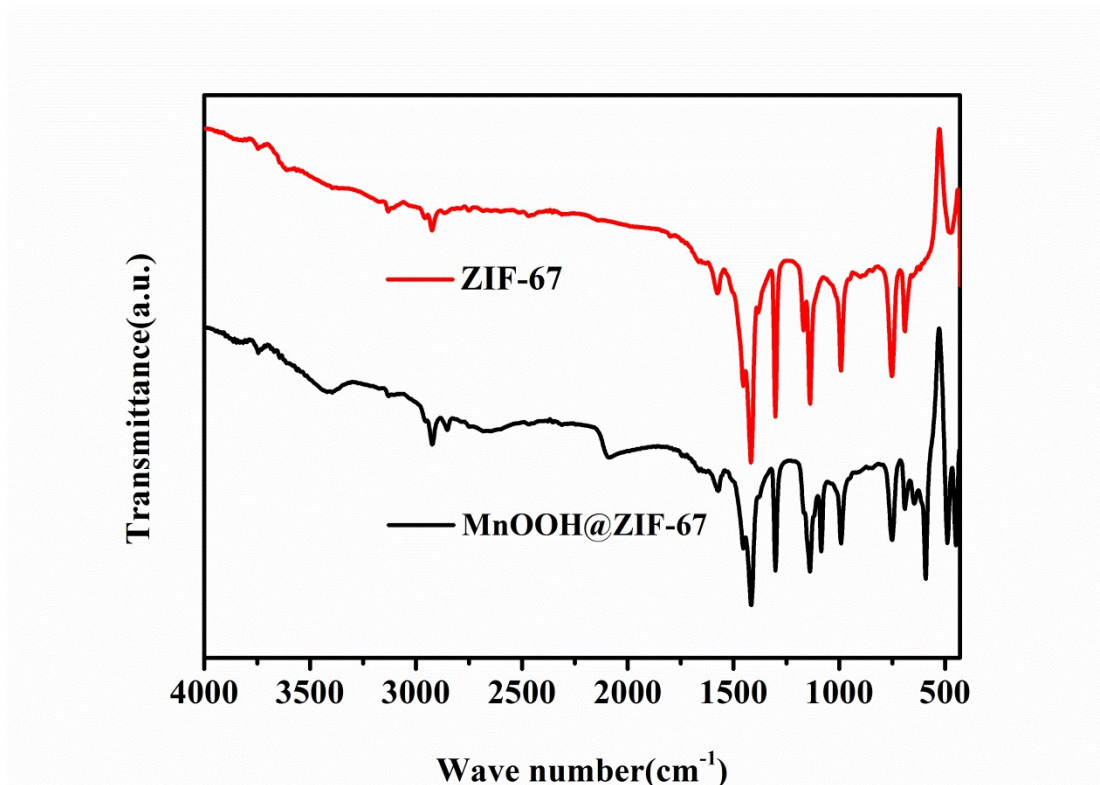

Fig. S3. FT-IR spectrum of MnOOH@ZIF-67 and ZIF-67.

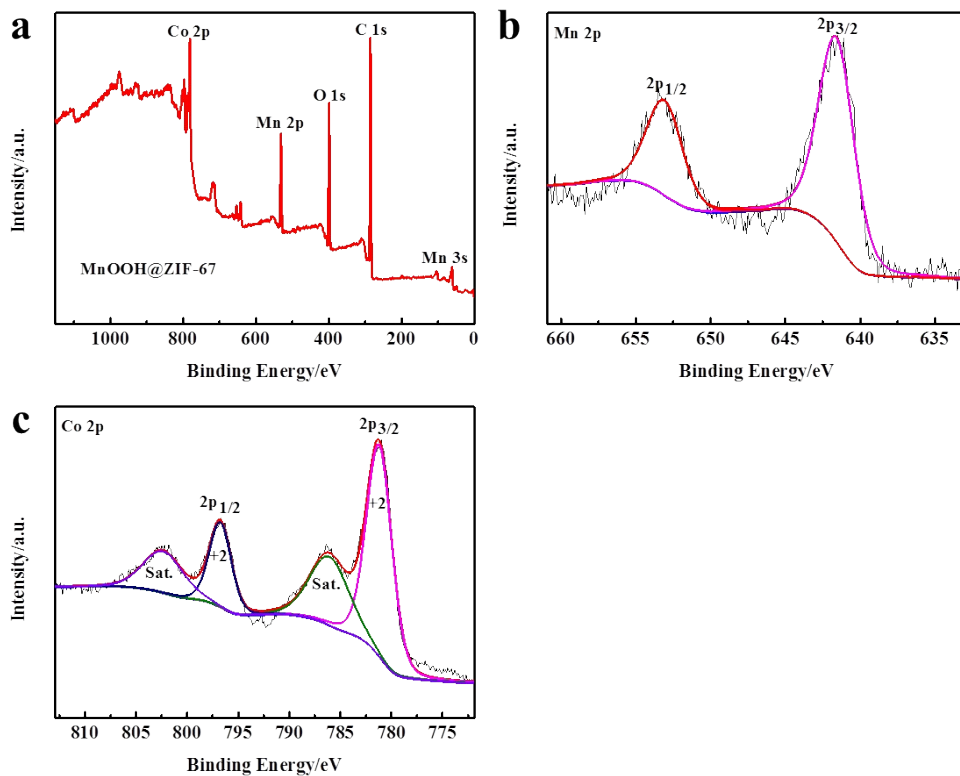

Fig. S4. XPS spectrum of MnOOH@ZIF-67. (a) survey spectrum of MnOOH@ZIF-67, (b) Mn 2p, (c) Co2p.

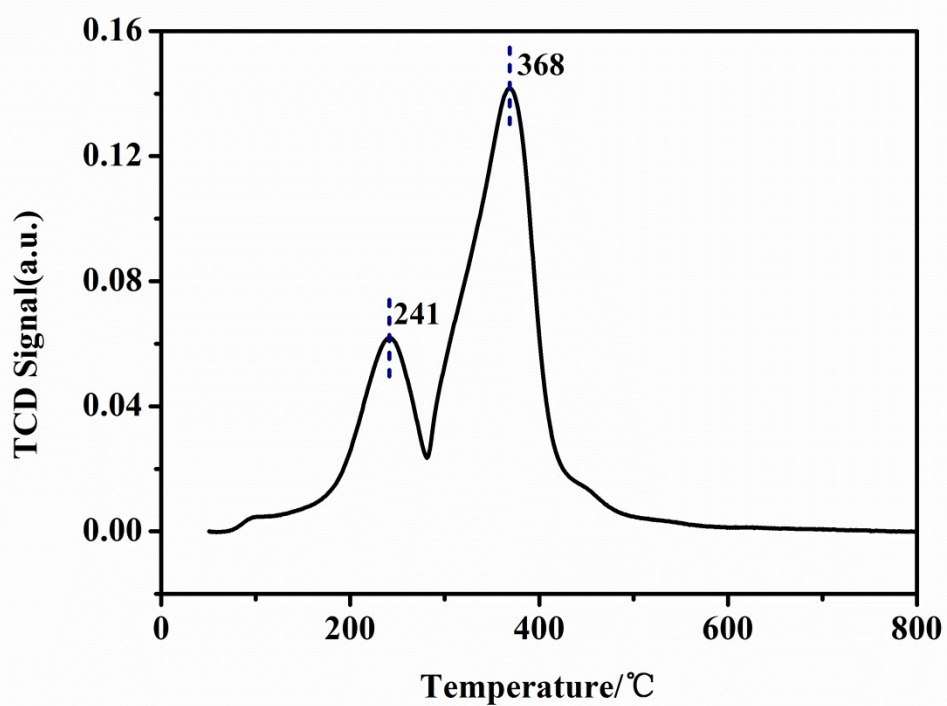

Fig. S5. H<sub>2</sub>-TPR profiles of MnO<sub>2</sub>@Co<sub>3</sub>O<sub>4</sub>.

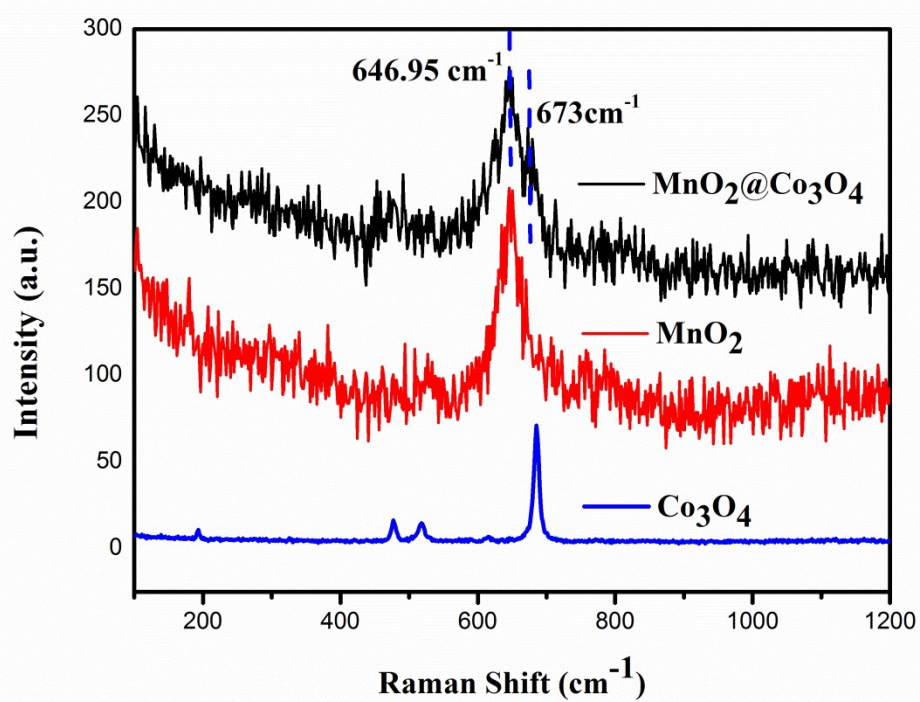

Fig. S6. Raman spectrum of MnO<sub>2</sub>@Co<sub>3</sub>O<sub>4</sub>, MnO<sub>2</sub> and Co<sub>3</sub>O<sub>4</sub>.

Table S1. Electrochemical impedance parameters of the MnO<sub>2</sub>@Co<sub>3</sub>O<sub>4</sub>

| Rs( $\Omega$ ) | Rct( $\Omega$ ) | Zw( $\Omega$ ) |
|----------------|-----------------|----------------|
| 1.816          | 94.99           | 4.867E-3       |

Table S2. Comparison of electrochemical properties of various cobalt-manganese oxides

| Material                                                                         | Current density(mAg <sup>-1</sup> ) | 2 <sup>nd</sup> cycle discharge capacity(mAhg <sup>-1</sup> ) | Discharge capacity(mAhg <sup>-1</sup> )/Number of cycles | Refence   |
|----------------------------------------------------------------------------------|-------------------------------------|---------------------------------------------------------------|----------------------------------------------------------|-----------|
| mesoporous $\beta$ -MnO <sub>2</sub>                                             | 250                                 | 1400                                                          | 350(100cycles)                                           | 5         |
| Co-Co <sub>3</sub> O <sub>4</sub> @CNTs                                          | 500                                 | ≈700                                                          | 913.3(100cycles)                                         | 23        |
| 3D Co <sub>3</sub> O <sub>4</sub> @MnO <sub>2</sub>                              | 120                                 | ≈1350                                                         | 924(100cycles)                                           | 40        |
| MnO <sub>2</sub> -Co <sub>3</sub> O <sub>4</sub> -RGO                            | 500                                 | ≈590                                                          | 577.4(500cycles)                                         | 41        |
| MnO <sub>2</sub> /Co <sub>3</sub> O <sub>4</sub>                                 | 2000                                | ≈600                                                          | 581.8(1100cycles)                                        | 42        |
| (Co,Mn)(Co,Mn) <sub>2</sub> O <sub>4</sub> /Co <sub>3</sub> O <sub>4</sub> / MnO | 1000                                | 969.2                                                         | 2175.8(1000cycles)                                       | 43        |
| 1D MnO <sub>2</sub> @Co <sub>3</sub> O <sub>4</sub>                              | 2000                                | 1016.2                                                        | 647.4(400cycles)                                         | This work |
